# Supplementary material for: A Metabolomics Approach and Chemometric Tools for Differentiation of Barley Cultivars and Biomarker Discovery
Source: MDPI journal article supplement (doi:10.3390/metabo11090578), 2021-08-26
Supplement: s1 [file s1]

# A Metabolomics Approach and Chemometric Tools for Differentiation of Barley Cultivars and Biomarker Discovery

Claude Y. Hamany Djande, Lizelle A. Piater, Paul A. Steenkamp, Fidele Tugizimana and Ian A. Dubery\*.

Research Centre for Plant Metabolomics, Department of Biochemistry, University of Johannesburg, P.O. Box 524, Auckland Park, Johannesburg 2006, South Africa; 201410297@student.uj.ac.za (C.Y.H-D.); ftugizimana@uj.ac.za (F.T.); psteenkamp@uj.ac.za (P.A.S.); lpiater@uj.ac.za (L.A.P.)

\* Correspondence: idubery@uj.ac.za; Tel.: +27-11-5592401

---

**Figure S1.** Ultra-high performance liquid chromatography - mass spectrometry (UHPLC-MS) base peak intensity (BPI) chromatograms (ESI+ mode) of leaf - and root extracts from five different barley cultivars from the Western Cape region of South Africa;

**Figure S2.** Principal component analysis (PCA) score plot models and hierarchical cluster analysis (HiCA) dendrograms of leaf and roots extracts of five cultivars of *Hordeum vulgare*.

**Figure S3.** Partial least squares discriminant analyses (PLS-DA) score plots, showing group separation for leaf (A) and root (B) extracts from barley cultivars 'Erica', 'Agulhas', 'S16', 'Elim' and 'Hessekwa'.

**Figure S4.** Discriminant metabolites selected on OPLS-DA S-plots generated from the comparison of root extracts from five cultivars with each other.

**Figure S5:** (A) Ultra-high performance liquid chromatography - mass spectrometry (UHPLC-MS) base peak intensity (BPI) chromatograms (ESI- mode) of blank and Western Cape quality control (WCQC1) samples. (B) A scores plot (PC1 vs. PC2) with QC samples.

**Table S1.** List of all annotated / putatively identified metabolites extracted from leaves and roots of the barley cultivars 'Erica', 'Agulhas', 'S16', 'Elim' and 'Hessekwa'.

**Table S2.** Performance parameters calculated for all the OPLS-DA models generated from leaf and root datasets.

**Table S3.** Statistical parameters for the annotated discriminant metabolites selected from OPLS-DA models comparing 'Erica' vs. 'Elim'.

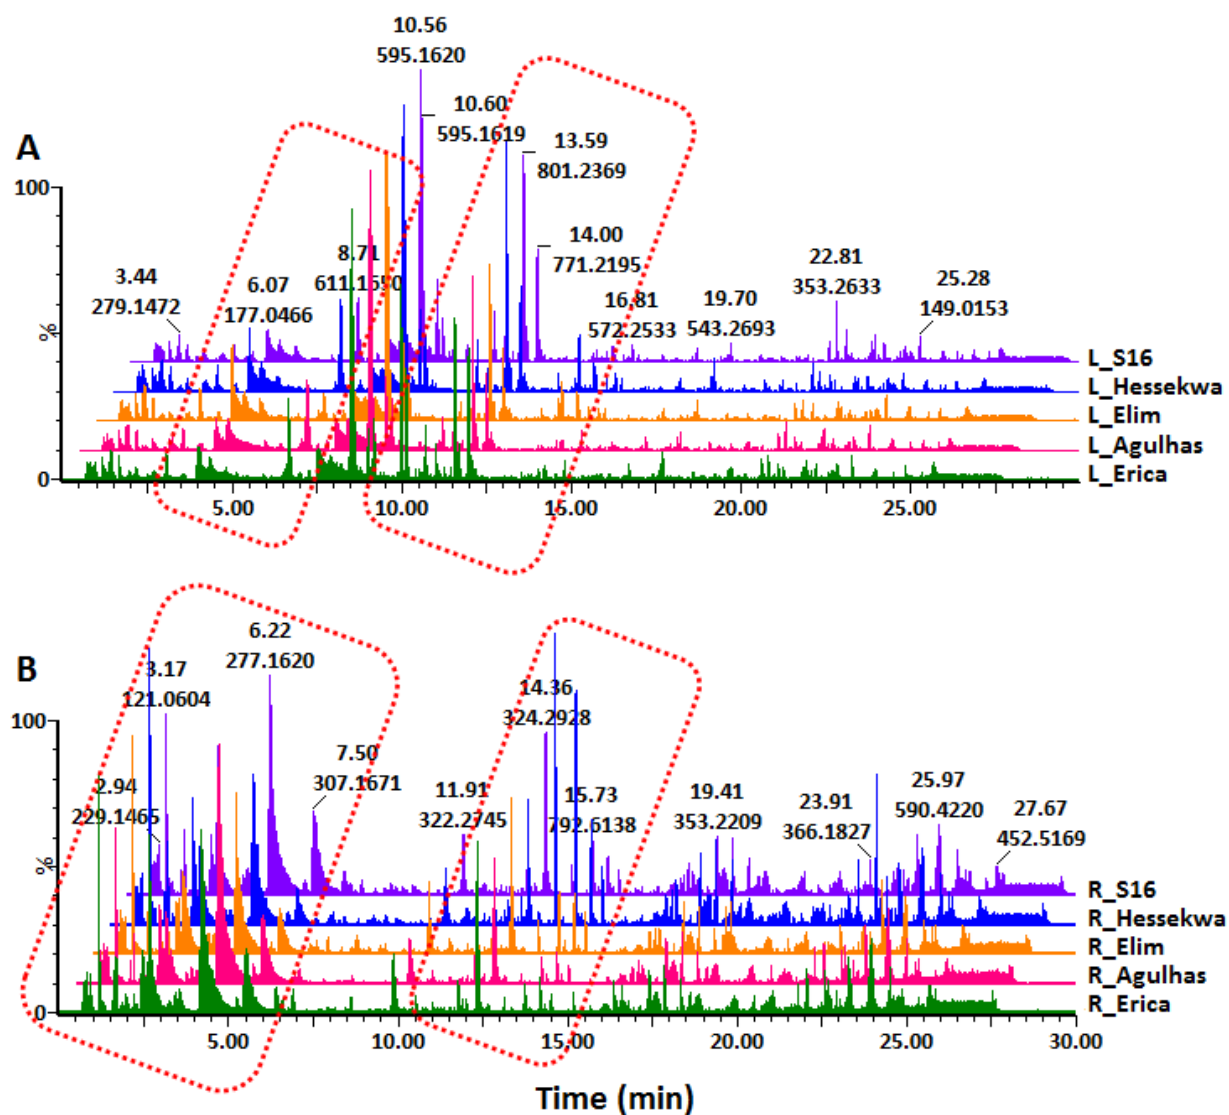

**Figure S1.** Ultra-high performance liquid chromatography - mass spectrometry (UHPLC-MS) base peak intensity (BPI) chromatograms (ESI+ mode) of (A) leaf and (B) root extracts from five different barley cultivars from the Western Cape region of South Africa cultivated under controlled conditions and harvested after 21 days.

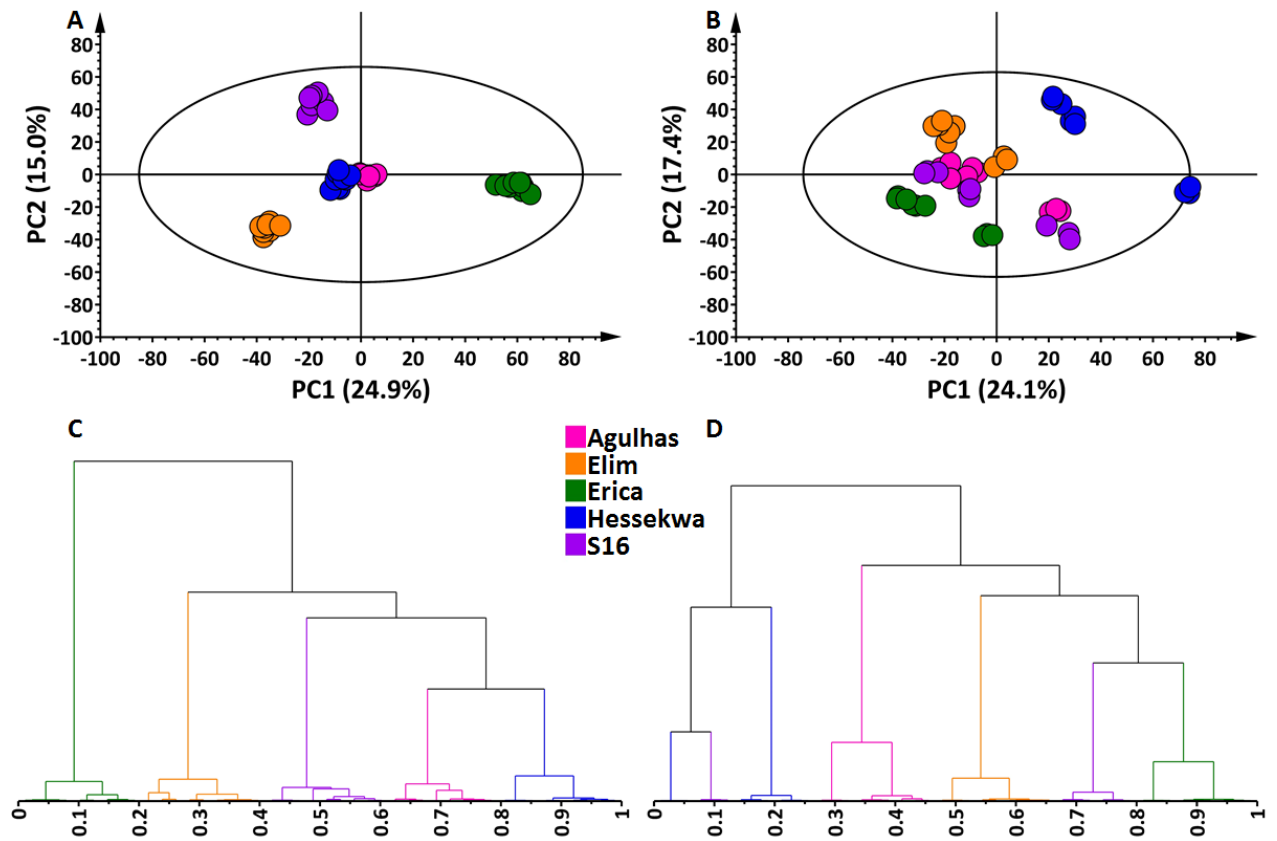

**Figure S2.** Principal component analysis (PCA) score plots and hierarchical cluster analysis (HiCA) dendrograms of ESI(+) data from leaf and roots extracts of five cultivars of *Hordeum vulgare*. The calculated Hotelling's T<sup>2</sup> with a 95% confidence interval is represented by the ellipses present in each PCA scores plot. HiCAs are computed on low-dimensional data derived from the corresponding PCA modeling and highlight sub-clustering formed within the samples. The datasets used to compute these models consisted of 1148 features in leaves and 781 in roots. (A) A scores plot (PC1 vs PC2) of a 6-component (PCA) model explaining 66.5% variation in a *Pareto*-scaled, and predicting 51.3% variation in leaves; (B) A scores plot (PC1 vs PC2) of a 5-component model explaining 72.0% variation in a *Pareto*-scaled, and predicting 63.3% variation in roots; (C) HiCA dendrogram corresponding to the PCA model in A, and (D) HiCA dendrogram corresponding to the PCA model in B for root extract.

**Table S1.** List of all annotated metabolites extracted from leaves and roots of the barley cultivars ‘Erica’, ‘Agulhas’, ‘S16’, ‘Elim’ and ‘Hessekwa’.

| No                                          | Annotated Metabolites                                 | Rt (min) | <i>m/z</i> (ESI-) | <i>m/z</i> (ESI+) | Leaf CV (%) | Root CV (%) | References |
|---------------------------------------------|-------------------------------------------------------|----------|-------------------|-------------------|-------------|-------------|------------|
| <b>Hydroxybenzoic acids</b>                 |                                                       |          |                   |                   |             |             |            |
| 1                                           | Protocatechuic acid hexose                            | 1.69     | 315.0749          |                   | 1.22        | 17.73       | [16]       |
| 2                                           | Benzylalcohol-hexose-pentose                          | 5.66     | 401.1405          |                   | 8.15        | 10.95       | [15,16]    |
| 3                                           | Gallic acid monohydrate                               | 12.56    | 187.0942          |                   | 20.50       | 2.954       | [16]       |
| <b>Hydroxycinnamic acid and derivatives</b> |                                                       |          |                   |                   |             |             |            |
| 4                                           | Ferulic acid hexose                                   | 1.76     | 355.0676          |                   | 16.03       |             | [18,19]    |
| 5                                           | 3-Caffeoylquinic acid                                 | 2.16     | 353.0865          |                   | 10.37       |             | [17-19]    |
| 6                                           | 3-Feruloylquinic acid                                 | 4.08     | 367.1053          |                   | 10.11       |             | [17-19]    |
| 7                                           | Sinapic acid hexose                                   | 5.37     | 385.1129          |                   | 9.72        |             | [65,66]    |
| 8                                           | 4-Feruloylquinic acid                                 | 7.44     | 367.0996          |                   | 10.11       |             | [18,19]    |
| <b>Hydroxycinnamic acid amides</b>          |                                                       |          |                   |                   |             |             |            |
| 9                                           | <i>p</i> -Coumaroylputrescine                         | 2.46     |                   | 235.1346          |             | 4.29        | [15,20]    |
| 10                                          | <i>p</i> -Coumaroylhydroxyagmatine                    | 2.66     | 291.1426          | 293.1544          | 9.37        | 10.05       | [19,21,22] |
| 11                                          | Feruloylagmatine isomer I                             | 3.29     |                   | 307.1745          |             | 5.15        | [19,21,22] |
| 12                                          | Feruloylhydroxyagmatine                               | 3.54     |                   | 323.1679          | 7.65        | 11.68       | [19,21,22] |
| 13                                          | <i>p</i> -Coumaroylagmatine                           | 4.23     |                   | 277.1581          | 5.28        | 12.86       | [19,21,22] |
| 14                                          | Feruloylagmatine isomer II                            | 5.49     |                   | 307.1705          | 9.24        | 17.40       | [19,21,22] |
| 15                                          | Sinapoylagmatine isomer I                             | 6.41     |                   | 337.1794          |             | 8.27        | [19,21,22] |
| 16                                          | Sinapoylhydroxyagmatine                               | 6.54     | 351.1222          |                   | 18.61       | 11.14       | [19,21,22] |
| 17                                          | Sinapoylagmatine isomer II                            | 7.89     |                   | 337.1819          |             | 9.20        | [19,21,22] |
| <b>Benzofurans</b>                          |                                                       |          |                   |                   |             |             |            |
| 18                                          | Hordatine B isomer I                                  | 7.60     | 579.2993          | 581.3153          | 8.57        |             | [19,21,22] |
| 19                                          | Hordatine B isomer II                                 | 7.72     |                   | 581.3143          | 10.72       |             | [19,21,22] |
| 20                                          | Hordatine D                                           | 7.82     |                   | 641.1716          | 5.72        |             | [19,21,22] |
| 21                                          | Hordatine A                                           | 7.93     | 549.2915          | 551.3013          | 8.20        |             | [19,21,22] |
| 22                                          | Hordatine C                                           | 8.25     | 609.3073          | 611.3342          | 20.28       |             | [19,21,22] |
| 23                                          | Hordatine C hexose isomer I                           | 3.56     | 771.2131          |                   | 12.40       |             | [19,21,22] |
| 24                                          | Hordatine B hexose                                    | 4.03     | 787.3706          | 743.382           | 14.08       |             | [19,21,22] |
| 25                                          | Hordatine A hexose                                    | 4.34     | 757.3595          | 713.3724          | 3.10        |             | [19,21,22] |
| 26                                          | Hordatine C hexose isomer II                          | 5.41     | 771.1981          |                   | 12.67       |             | [19,21,22] |
| <b>Flavonoids</b>                           |                                                       |          |                   |                   |             |             |            |
| 27                                          | Isoorientin 7-O-glucoside / Lutronarin                | 6.74     | 609.1421          | 611.1583          | 16.91       |             | [19,20,23] |
| 28                                          | Isovitexin -7-O-glucoside / Saponarin                 | 8.64     | 593.1534          |                   | 7.23        | 14.58       | [15,19,20] |
| 29                                          | Isovitexin 7-O-rhamnosylglucoside                     | 9.04     | 739.23            |                   | 13.70       |             | [15,19,20] |
| 30                                          | Isoscoparin 7-O-glucoside                             | 9.20     | 623.1533          |                   | 9.74        |             | [19]       |
| 31                                          | Isovitexin 7-O-[6"-sinapoyl]-glucoside 4'-O-glucoside | 9.40     | 961.2755          |                   | 6.11        |             | [19]       |
| 32                                          | Isovitexin derivative                                 | 9.91     | 611.2522          |                   | 8.23        |             | [19]       |
| 33                                          | Isovitexin 2"-O-glucoside                             | 10.01    | 593.1427          | 595.1627          | 11.76       |             | [19]       |
| 34                                          | Isovitexin 2"-O-arabinoside isomer I                  | 10.15    | 563.134           | 565.1579          | 5.01        |             | [19]       |
| 35                                          | Isovitexin 6"-O-glucoside                             | 10.21    |                   | 595.1653          | 6.92        |             | [19]       |
| 36                                          | Isovitexin 2"-O-arabinoside isomer II                 | 10.43    | 563.1417          |                   | 2.53        |             | [19]       |
| 37                                          | Luteolin 7-O-arabinosylglucoside                      | 10.91    | 579.1371          |                   | 27.07       |             | [19]       |

|                                    |                                                                                                   |       |          |          |       |       |                    |
|------------------------------------|---------------------------------------------------------------------------------------------------|-------|----------|----------|-------|-------|--------------------|
| 38                                 | Isovitexin 7-O-[6''-sinapoyl]-glucoside                                                           | 11.59 | 799.2158 | 801.2339 | 35.63 |       | [19]               |
| 39                                 | Isoscoparin 7-O-[6''-sinapoyl]-glucoside                                                          | 11.69 | 829.2297 |          | 8.04  |       | [19]               |
| 40                                 | Isovitexin 7-O-[X''-feruloyl]-glucoside                                                           | 11.98 | 769.2041 | 771.2312 | 10.22 |       | [19]               |
| 41                                 | Apigenin 7-O-arabinosylglucoside                                                                  | 12.06 | 563.14   |          | 8.92  |       | [19]               |
| 42                                 | Isoscoparin 7-O-[6''-feruloyl]-glucoside                                                          | 12.10 | 799.2159 |          | 3.96  |       | [19]               |
| 43                                 | Chrysoeriol 7-O-arabinosylglucoside                                                               | 12.37 | 593.144  | 595.163  | 3.21  |       | [19]               |
| 44                                 | 6-Prenylharingenin                                                                                | 19.18 | 339.2123 |          | 8.51  |       | [19]               |
| 45                                 | Isoorientin 7-O-[6''-sinapoyl]-glucoside                                                          | 10.71 | 815.2056 |          | 15.62 |       | [19]               |
| 46                                 | Flavonoid-related compound                                                                        | 11.03 |          | 787.2163 | 7.02  |       | [19]               |
| <b>Alkaloids</b>                   |                                                                                                   |       |          |          |       |       |                    |
| 47                                 | Hordenine                                                                                         | 1.17  |          | 166.1139 | 3.50  | 7.65  | Authentic Standard |
| <b>Amino acids and derivatives</b> |                                                                                                   |       |          |          |       |       |                    |
| 48                                 | Phenylalanine                                                                                     | 1.68  | 164.0699 | 166.0823 | 11.72 | 9.08  | [16,20,24]         |
| 49                                 | Tryptophan                                                                                        | 2.51  | 203.0767 | 205.0928 | 10.64 | 5.77  | [16,24]            |
| 50                                 | N-Acetylaspartylglutamic acid                                                                     | 6.03  | 303.0826 |          | 6.19  |       | [15-23]            |
| <b>Organic acids compounds</b>     |                                                                                                   |       |          |          |       |       |                    |
| 51                                 | Isocitric acid                                                                                    | 0.92  | 191.0038 |          | 9.62  | 9.10  | [25]               |
| 52                                 | Malic acid                                                                                        | 1.02  | 133.012  |          | 6.69  | 9.56  | [25]               |
| 53                                 | Citric acid                                                                                       | 1.16  | 191.0066 |          | 10.53 | 9.11  | [25]               |
| 54                                 | Succinic acid                                                                                     | 1.20  | 117.0103 |          | 8.21  | 10.89 | [15, 25,29]        |
| 55                                 | Citric acid derivative                                                                            | 1.41  | 306.1123 |          | 14.58 |       |                    |
| <b>Fatty acids and derivatives</b> |                                                                                                   |       |          |          |       |       |                    |
| 56                                 | $\alpha$ -Linolenoyl ethanolamide / N-(9Z,12Z,15Z-octadecatrienoyl)-ethanolamine                  | 9.87  |          | 322.2772 |       | 4.21  | [15]               |
| 57                                 | Linoleoyl ethanolamide / N-(2-Hydroxyethyl)linoleamide /N-(2-Hydroxyethyl)-9,12-octadecadienamide | 12.33 |          | 324.2901 |       | 16.37 | [15]               |
| 58                                 | (10E,15Z) 9,12,13-trihydroxyoctadeca-10,15-dienoic acid isomer I (9,12,13-TriHODE)                | 16.57 | 327.2131 |          | 14.32 |       | [20,26]            |
| 59                                 | 9,12,13-TriHODE isomer II                                                                         | 16.67 | 327.2170 |          | 15.66 | 18.79 | [20,26]            |
| 60                                 | 9,12,13-TriHODE isomer III                                                                        | 16.79 | 327.2132 |          | 15.66 |       | [20,26]            |
| 61                                 | Trihydroxyoctadecenoic acid                                                                       | 17.38 | 329.2278 |          | 12.41 | 6.39  | [20,26]            |
| 62                                 | 9-Oxo-12,13-dihydroxy-10E,15Z-octadecadienoic acid (9K,12,13-diHODE)                              | 17.61 | 325.1967 |          | 4.57  | 9.22  | [20,26]            |
| 63                                 | OPDA conjugate isomer I                                                                           | 19.61 | 309.2024 |          | 21.80 | 10.61 | [27]               |
| 64                                 | OPDA conjugate isomer II                                                                          | 19.68 | 309.1991 |          | 8.67  | 16.96 | [27]               |
| 65                                 | 9-Hydroxy-12-oxo-10(E),15(Z)-octadecadienoic acid isomer I (12K, 9-HODE)                          | 20.09 | 309.2034 |          | 11.66 |       | [27]               |
| 66                                 | 12K, 9-HODE isomer II                                                                             | 20.59 | 309.2019 |          | 11.73 | 6.56  | [27]               |
| 67                                 | Linolenic acid derivative I isomer I                                                              | 20.77 | 675.3553 |          | 12.13 |       | [23]               |
| 68                                 | 12-Oxo-Phytodienoic Acid (12-OPDA)                                                                | 21.11 | 291.1946 |          | 12.42 |       | [27,28]            |
| 69                                 | Hydroxyoctadecadienoic acid / Hydroxylinoic acid                                                  | 22.37 | 295.2256 |          | 11.27 | 5.05  | [28]               |
| 70                                 | Linolenic acid derivative I isomer II                                                             | 21.07 | 675.3615 |          | 6.13  |       | [23]               |
| 71                                 | Linolenoylglycerol / monolinolenin Isomer I                                                       | 20.81 |          | 353.2632 | 7.90  | 17.91 | [15,20,23]         |
| 72                                 | Linolenoylglycerol / monolinolenin Isomer II                                                      | 21.11 |          | 353.2595 | 10.06 |       | [15,20,23]         |

|    |                                                  |       |          |       |            |
|----|--------------------------------------------------|-------|----------|-------|------------|
| 73 | Linolenoylglycerol / monolinolenin Isomer<br>III | 21.27 | 353.2644 | 11.42 | [15,20,23] |
| 74 | Linolenoylglycerol / monolinolenin Isomer<br>VI  | 21.94 | 353.2625 | 10.26 | [15,20,23] |
| 75 | Linolenic acid derivative II                     | 22.69 | 445.2328 | 7.25  | [23]       |

\***Rt**: Retention time; **m/z**: mass-to-charge ratio; **ESI-/+**: electrospray ionisation modes; **PLS-DA**: partial least square-discriminant analysis; **OPLS-DA**: orthogonal projection to latent structures-discriminant analysis.

**CV**: coefficient of variation.

\*\*Metabolites were annotated corresponding to the Metabolomics Standards Initiative (MSI) level 2, based on accurate mass values, empirical formulae and mass fragmentation data (section. 4.3).

\*\*\* The annotation of metabolites was conducted on the combined quality control samples (QCs) for leaf and root extracts. For phenotyping, two supervised learning algorithms were employed to select discriminant metabolites; the PLS-DA and OPLS-DA as mentioned under 'Materials and Methods'.

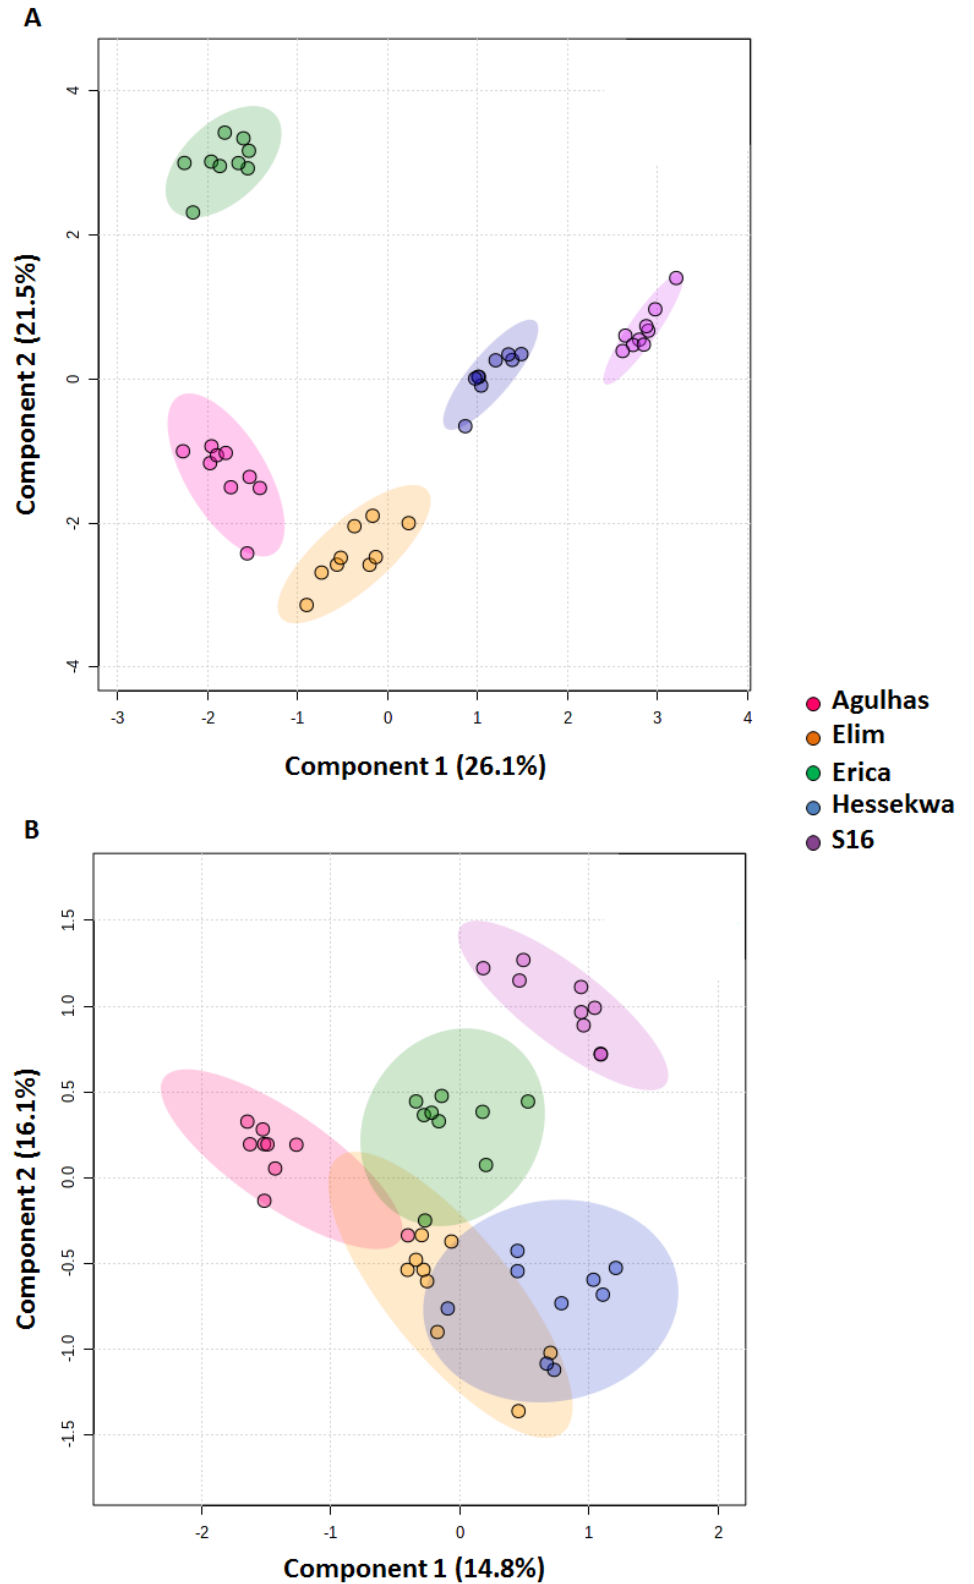

**Figure S3.** Partial least squares discriminant analyses (PLS-DA) score plots, showing group separation for leaf (**A**) and root (**B**) extracts from barley cultivars 'Erica', 'Agulhas', 'S16', 'Elim' and 'Hessekwa'. (Non-redundant data from both positive and negative ionisation modes combined was used to construct the plots).

**Table S2.** Performance parameters calculated for all the OPLS-DA models generated from leaf and root datasets.

| Leaf extracts |                  |                |                      |              |                  |                |                      |           |
|---------------|------------------|----------------|----------------------|--------------|------------------|----------------|----------------------|-----------|
| ESI Negative  |                  |                |                      | ESI Positive |                  |                |                      |           |
| Cultivars     | R <sup>2</sup> X | Q <sup>2</sup> | CV-ANOVA             | Cultivars    | R <sup>2</sup> X | Q <sup>2</sup> | CV-ANOVA             | Cultivars |
| Erica         | 0.628            | 0.997          | 7.78e <sup>-16</sup> | Elim         | 0.591            | 0.995          | 5.75e <sup>-15</sup> | Erica     |
| Erica         | 0.538            | 0.995          | 1.38e <sup>-14</sup> | Hessekwa     | 0.529            | 0.992          | 1.48e <sup>-15</sup> | Erica     |
| Erica         | 0.498            | 0.992          | 1.48e <sup>-13</sup> | Agulhas      | 0.652            | 0.979          | 9.11e <sup>-11</sup> | Erica     |
| Erica         | 0.581            | 0.994          | 2.30e <sup>-14</sup> | S16          | 0.575            | 0.991          | 3.63e <sup>-13</sup> | Erica     |
| Elim          | 0.472            | 0.987          | 3.87e <sup>-12</sup> | Hessekwa     | 0.471            | 0.986          | 7.88e <sup>-12</sup> | Elim      |
| Elim          | 0.508            | 0.993          | 7.97e <sup>-14</sup> | Agulhas      | 0.695            | 0.986          | 1.53e <sup>-09</sup> | Elim      |
| Elim          | 0.542            | 0.993          | 1.10e <sup>-13</sup> | S16          | 0.52             | 0.988          | 2.04e <sup>-12</sup> | Elim      |
| Hessekwa      | 0.459            | 0.983          | 8.31e <sup>-12</sup> | Agulhas      | 0.639            | 0.971          | 7.24e <sup>-10</sup> | Hessekwa  |
| Hessekwa      | 0.493            | 0.99           | 7.31e <sup>-13</sup> | S16          | 0.476            | 0.984          | 1.69e <sup>-11</sup> | Hessekwa  |
| Agulhas       | 0.474            | 0.989          | 1.81e <sup>-12</sup> | S16          | 0.656            | 0.98           | 6.15e <sup>-11</sup> | Agulhas   |
| Root extracts |                  |                |                      |              |                  |                |                      |           |
| ESI Negative  |                  |                |                      | Positive     |                  |                |                      |           |
| Cultivars     | R <sup>2</sup> X | Q <sup>2</sup> | CV-ANOVA             | Cultivars    | R <sup>2</sup> X | Q <sup>2</sup> | CV-ANOVA             | Cultivars |
| Erica         | 0.664            | 0.997          | 5.93e <sup>-16</sup> | Elim         | 0.591            | 0.986          | 7.71e <sup>-12</sup> | Erica     |
| Erica         | 0.621            | 0.995          | 4.86e <sup>-18</sup> | Hessekwa     | 0.721            | 0.993          | 9.21e <sup>-14</sup> | Erica     |
| Erica         | 0.462            | 0.986          | 5.86e <sup>-12</sup> | Agulhas      | 0.595            | 0.984          | 1.44e <sup>-11</sup> | Erica     |
| Erica         | 0.608            | 0.992          | 2.15e <sup>-13</sup> | S16          | 0.625            | 0.984          | 1.53e <sup>-11</sup> | Erica     |
| Elim          | 0.512            | 0.989          | 1.42e <sup>-12</sup> | Hessekwa     | 0.66             | 0.989          | 1.60e <sup>-12</sup> | Elim      |
| Elim          | 0.612            | 0.993          | 8.76e <sup>-14</sup> | Agulhas      | 0.623            | 0.993          | 1.03e <sup>-13</sup> | Elim      |
| Elim          | 0.543            | 0.991          | 3.24e <sup>-13</sup> | S16          | 0.616            | 0.969          | 1.10e <sup>-09</sup> | Elim      |
| Hessekwa      | 0.638            | 0.999          | 3.08e <sup>-14</sup> | Agulhas      | 0.636            | 0.987          | 3.77e <sup>-12</sup> | Hessekwa  |
| Hessekwa      | 0.597            | 0.994          | 1.76e <sup>-14</sup> | S16          | 0.697            | 0.981          | 5.65e <sup>-11</sup> | Hessekwa  |
| Agulhas       | 0.578            | 0.992          | 2.19e <sup>-13</sup> | S16          | 0.504            | 0.979          | 8.18e <sup>-11</sup> | Agulhas   |

**Table S3.** Statistical parameters for the annotated discriminant metabolites selected from OPLS-DA models comparing leaf extracts from 'Erica' *vs.* 'Elim'.

| Discriminant metabolites                | VIP scores | p-score              | p(corr)  | L_Erica | L_Elim |
|-----------------------------------------|------------|----------------------|----------|---------|--------|
| Isovitexin 2''-O-glucoside              | 8.97       | 3.19e <sup>-17</sup> | -0.99453 | +       | -      |
| Isovitexin 2''-O-arabinoside isomer I   | 7.87       | 1.53e <sup>-17</sup> | -0.99546 | +       | -      |
| Saponarin                               | 4.51       | 1.82e <sup>-4</sup>  | 0.768655 | -       | +      |
| Lutonarin                               | 3.92       | 8.76e <sup>-09</sup> | -0.94024 | +       | -      |
| Isocitric acid                          | 3.79       | 1.08e <sup>-07</sup> | 0.913522 | -       | +      |
| Isovitexin 7-O-rhamnosylglucoside       | 3.56       | 2.36e <sup>-07</sup> | 0.906435 | -       | +      |
| Citric acid                             | 3.43       | 3.81e <sup>-05</sup> | 0.815452 | -       | +      |
| 3-Feruloylquinic acid                   | 3.40       | 3.23e <sup>-08</sup> | -0.92682 | +       | -      |
| Isorientin 7-O-[6''-sinapoyl]-glucoside | 3.26       | 2.31e <sup>-08</sup> | -0.97072 | +       | -      |
| Isovitexin 6''-O-glucoside              | 3.25       | 1.08e <sup>-17</sup> | -0.99531 | +       | -      |
| Flavonoid-related compound              | 3.29       | 3.52e <sup>-12</sup> | -0.90728 | +       | -      |
| Isovitexin 7-O-[6''-sinapoyl]-glucoside | 3.14       | 3.64e <sup>-4</sup>  | 0.746233 | -       | +      |



|                                         |      |                      |          |   |   |
|-----------------------------------------|------|----------------------|----------|---|---|
| Isovitexin 7-O-[X''-feruloyl]-glucoside | 3.13 | 1.52e <sup>-05</sup> | -0.83667 | + | - |
|-----------------------------------------|------|----------------------|----------|---|---|

(+) Positively correlated to cultivar. (-) Negatively correlated to the cultivar. The VIP score threshold of > 1 was selected based on a  $p(\text{corr}) \geq 0.5, \leq -0.5$ . CV-Anova  $p$ -scores (derived from SIMCA software) indicate the significance of specific metabolite levels to the OPLS-DA model.

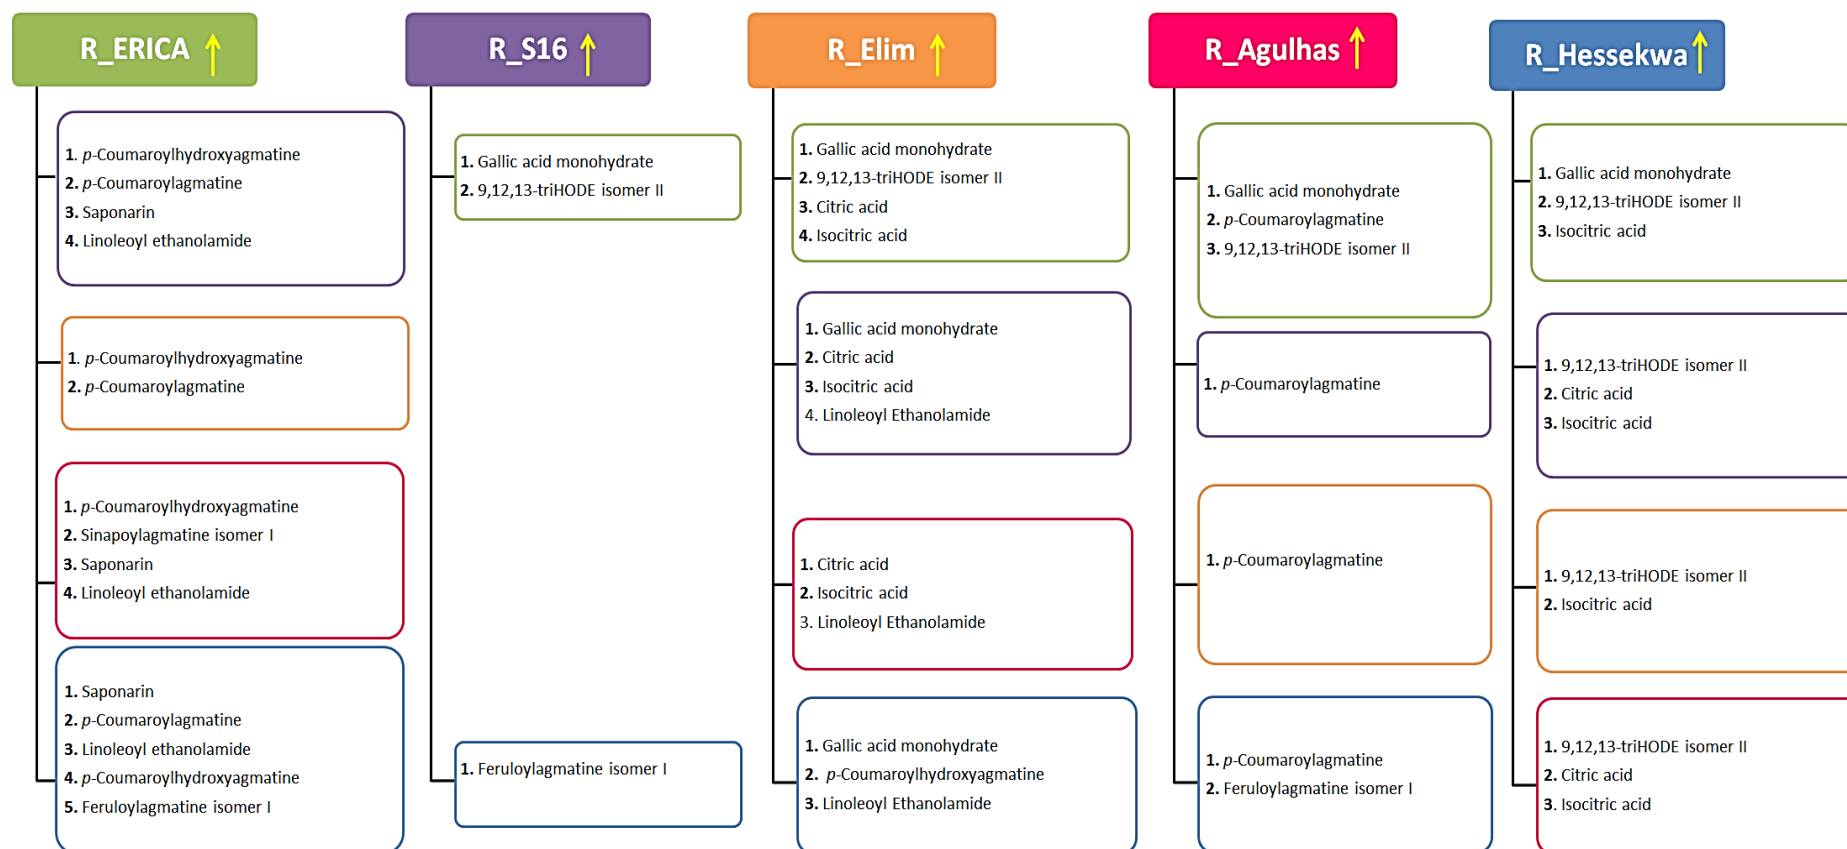

**Figure S4.** Discriminant metabolites selected on OPLS-DA S-plots generated from the comparison of extracts from roots of five cultivars with each other. The arrow indicates the positive correlation of the four groups of metabolites with the corresponding cultivars, e.g., in the first the column, all metabolites in the dark purple rectangle (corresponding to 'S16') are positively correlated with 'Erica' and negatively correlated with 'S16'.

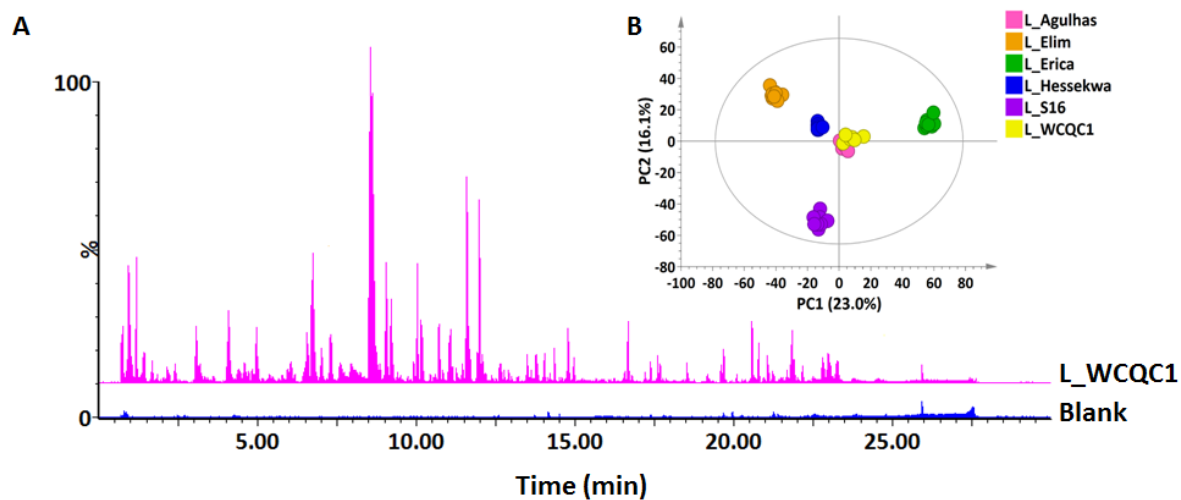

**Figure S5. (A)** Ultra-high performance liquid chromatography - mass spectrometry (UHPLC-MS) base peak intensity (BPI) chromatograms in negative electrospray ionisation (ESI) mode of blank and Western Cape quality control (WCQC1) samples. **(B)** A scores plot (PC1 *vs.* PC2) of a 4-component (PCA) model (*Pareto* scaled) explaining 57.6% variation and predicting 49.0% variation in leaves. The QC samples are clustering close to each other, indicating the stability of the LC-MS system and reproducibility of the analyses.
